# Supplementary material for: Tumor Cell–Free DNA Copy Number Instability Predicts Therapeutic Response to Immunotherapy
Source: Oxford University Press journal article supplement (doi:10.1158/1078-0432.ccr-17-0231), 2017-03-20
Supplement: 10780432ccr170231-sup-177920_2_supp_3899623_dmkhvd.docx [file 10780432ccr170231-sup-177920_2_supp_3899623_dmkhvd.docx]

| **Supplementary Table 3: Primer Sequences** | |
| --- | --- |
| S55.F | TGGTTAAACTGTAGTACATCCATGGA |
| S55.R | ACCTTTTGGGACTGGCTTTCT |
| S55.ProbeA | HEX-ACTTCTCAGCAACAGCCTGGA-BHQ1 |
| S55.ProbeB | HEX-CTCTGGAAATTCATCCAGCCTGT-BHQ1 |
| S110_Primer.F | GGTCCTACCGAGGTGGGTGA |
| S110_Primer.R | CATTGCCAAGGACAGAGGGAGA |
| S110.ProbeA | HEX-TTTGGTAGGGAAGGAACTCCCAAT-BHQ1 |
| S110.ProbeB | HEX-ATCAGTGGCCATTGTGAGTTCC-BHQ1 |
| BT3DEL_Primer.F | GATGAGTGTTCTGGGTGGAAG |
| BT3DEL_Primer.R | CTGTGTCTGCCCATCTCTG |
| BT3DEL_Probe_FAM | FAM-AGGTCCCTAGTCTCTGCCTTCCC-BHQ1 |
| Foxp3_meth_forward | GTTTTCGATTTGTTTAGATTTTTTCGTT |
| Foxp3_meth_reverse | CCTCTTCTCTTCCTCCGTAATATCG |
| Foxp3_meth_probe | HEX-ATGGCGGTCGGATGCGTC-BHQ1 |
| Foxp3_demeth_forward | GTTTTTGATTTGTTTAGATTTTTTTGTT |
| Foxp3_demeth_reverse | CCTCTTCTCTTCCTCCATAATATCA |
| Foxp3_demeth_probe | FAM-ATGGTGGTTGGATGTGTTGGGTT-BHQ1 |
